# Supplementary material
Source: publisher figshare collection journal article supplement (https://frontiersin.figshare.com/ndownloader/files/31332160)
Supplement: Supplementary file [file 31332160]

**Supplementary Table 1. The search strategies of this meta-analysis**

|               | Search terms                                                                                                                    | No.     |
|---------------|---------------------------------------------------------------------------------------------------------------------------------|---------|
| <b>PubMed</b> |                                                                                                                                 |         |
| #1            | atrial fibrillation                                                                                                             | 92116   |
| #2            | cancer OR tumor OR malignancy                                                                                                   | 2021342 |
| #3            | non-vitamin K antagonist oral anticoagulants OR direct oral anticoagulants OR dabigatran OR rivaroxaban OR apixaban OR edoxaban | 16047   |
| #4            | vitamin K antagonists OR warfarin                                                                                               | 38425   |
| #5            | #1 and #2 and #3 and #4                                                                                                         | 172     |
| <b>Embase</b> |                                                                                                                                 |         |
| #1            | atrial fibrillation                                                                                                             | 189562  |
| #2            | cancer                                                                                                                          | 4588663 |
| #3            | tumor                                                                                                                           | 3247476 |
| #4            | malignancy                                                                                                                      | 278446  |
| #5            | #2 OR #3 OR #4                                                                                                                  | 5975476 |
| #6            | non-vitamin K antagonist oral anticoagulants                                                                                    | 1397    |
| #7            | direct oral anticoagulants                                                                                                      | 6104    |
| #8            | dabigatran                                                                                                                      | 18172   |
| #9            | rivaroxaban                                                                                                                     | 21502   |
| #10           | apixaban                                                                                                                        | 15321   |
| #11           | edoxaban                                                                                                                        | 5982    |
| #12           | #6 OR #7 OR #8 OR #9 OR #10 OR #11                                                                                              | 35873   |
| #13           | vitamin K antagonists                                                                                                           | 7703    |
| #14           | warfarin                                                                                                                        | 101846  |

|     |                           |        |
|-----|---------------------------|--------|
| #15 | #13 OR #14                | 106755 |
| #16 | #1 and #5 and #12 and #15 | 944    |

**Supplementary Table 2. Adjusted confounders of the included studies**

| <b>Included studies</b><br><b>Confounders</b> | <b>Chen-2018</b> | <b>Fanol a-2018</b> | <b>Mello ni-2017</b> | <b>Ordin g-2021</b> | <b>Shah-2018</b> | <b>Pardo Sanz-2019</b> | <b>Sawan t-2019</b> | <b>Atter man-2021</b> | <b>Chan-2021</b> |
|-----------------------------------------------|------------------|---------------------|----------------------|---------------------|------------------|------------------------|---------------------|-----------------------|------------------|
| <i>Age</i>                                    | √                | √                   | √                    | √                   | √                |                        | √                   | √                     | √                |
| <i>Gender</i>                                 | √                | √                   |                      | √                   | √                |                        | √                   | √                     |                  |
| <i>Geographic region</i>                      | √                | √                   | √                    |                     |                  |                        |                     |                       |                  |
| <i>Race</i>                                   |                  | √                   |                      |                     |                  |                        |                     |                       |                  |
| <b>Clinical assessment</b>                    |                  |                     |                      |                     |                  |                        |                     |                       |                  |
| <i>CHA2DS2-VASc</i>                           |                  |                     |                      |                     | √                | √                      |                     |                       |                  |
| <i>HAS-BLED</i>                               |                  |                     |                      |                     |                  | √                      |                     |                       |                  |
| <i>Body mass index</i>                        | √                |                     |                      |                     |                  |                        |                     |                       |                  |
| <i>Weight</i>                                 |                  |                     | √                    |                     |                  |                        |                     |                       |                  |
| <i>Smoking</i>                                |                  | √                   |                      |                     |                  |                        |                     |                       |                  |
| <i>Alcohol</i>                                | √                |                     |                      |                     |                  |                        |                     | √                     |                  |
| <i>Fall</i>                                   |                  |                     |                      |                     |                  |                        |                     | √                     |                  |
| <i>Cancer type</i>                            |                  |                     |                      | √                   |                  | √                      | √                   |                       |                  |
| <i>AF type</i>                                | √                |                     | √                    |                     |                  |                        |                     |                       |                  |
| <i>High-dimensional</i>                       |                  |                     |                      |                     | √                |                        |                     |                       |                  |

|                                                 |   |   |   |   |   |  |  |   |   |
|-------------------------------------------------|---|---|---|---|---|--|--|---|---|
| <i>propensity scores</i>                        |   |   |   |   |   |  |  |   |   |
| <i>Albumin</i>                                  | √ |   |   |   |   |  |  |   |   |
| <i>Platelets</i>                                | √ |   |   |   |   |  |  |   |   |
| <i>Kidney function</i>                          | √ | √ |   |   |   |  |  | √ |   |
| <b>Comorbid conditions/past medical history</b> |   |   |   |   |   |  |  |   |   |
| <i>Ischaemic heart disease</i>                  |   | √ |   |   |   |  |  |   | √ |
| <i>Heart failure</i>                            | √ | √ |   | √ |   |  |  | √ | √ |
| <i>Diabetes mellitus</i>                        | √ | √ | √ | √ |   |  |  | √ | √ |
| <i>Hypertension</i>                             | √ | √ | √ | √ |   |  |  | √ | √ |
| <i>Anemia</i>                                   | √ |   |   |   |   |  |  | √ |   |
| <i>Vascular diseases</i>                        | . |   | √ |   |   |  |  | √ |   |
| <i>TIA/stroke/systemic embolism</i>             | √ | √ | √ | √ | √ |  |  |   | √ |
| <i>History of bleeding</i>                      | √ |   |   | √ | √ |  |  | √ | √ |
| <i>Hypothyroidism</i>                           |   | √ |   |   |   |  |  |   | √ |
| <i>Renal disease</i>                            |   |   |   |   |   |  |  |   | √ |
| <i>Liver disease</i>                            |   |   |   |   |   |  |  | √ | √ |
| <i>Chronic lung disease</i>                     | √ |   |   |   |   |  |  |   | √ |
| <i>Peripheral artery disease</i>                |   | √ |   |   |   |  |  |   |   |

| <b>Medications</b>                |   |   |   |   |  |   |  |   |   |
|-----------------------------------|---|---|---|---|--|---|--|---|---|
| <i>Anticoagulants(VKAs, etc.)</i> | √ | √ | √ |   |  | √ |  | √ |   |
| <i>ARB/ACE-I</i>                  |   |   |   |   |  |   |  |   | √ |
| <i>Calcium channel blocker</i>    |   |   |   |   |  |   |  |   | √ |
| <i>Beta-blockers</i>              |   |   |   |   |  |   |  |   | √ |
| <i>Platelet inhibitors</i>        | √ |   |   |   |  |   |  |   | √ |
| <i>Lipid lowering drugs</i>       |   |   |   | √ |  |   |  |   | √ |
| <i>H2 blockers</i>                |   |   |   |   |  |   |  |   | √ |
| <i>NSAIDS</i>                     |   |   |   |   |  |   |  |   | √ |

Note: The included studies of Ording-2017, Flack-2017, Kim-2018, and Yasui-2019 were used for analysis regarding the crude rates of effectiveness or safety outcomes between DOACs versus VKAs.

ARB/ACE-I=angiotensin receptor blocker/angiotensin converting enzyme inhibitor; NSAIDs=non-steroid anti-inflammatory drugs.

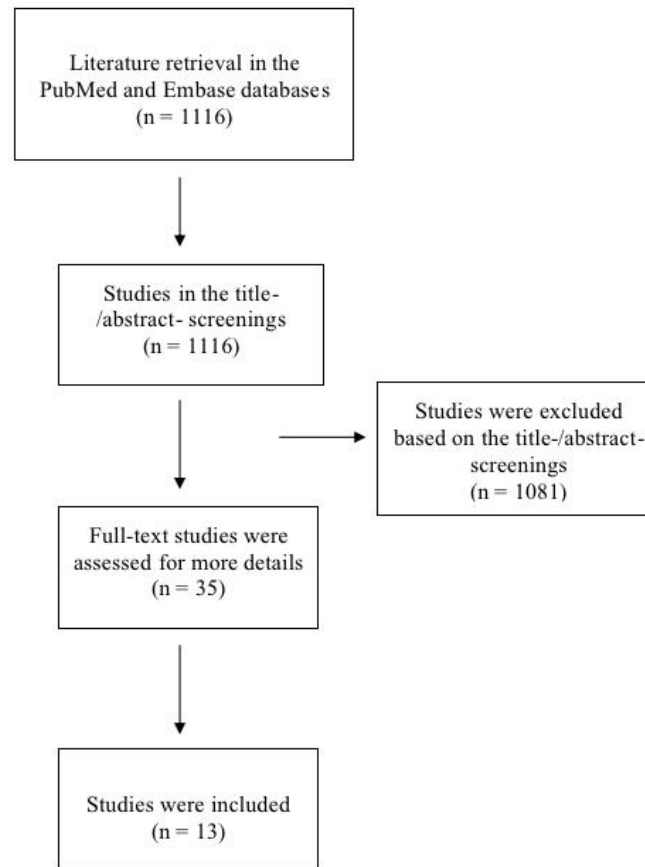

**Supplementary Figure 1. The process of the literature retrieval of this meta-analysis**

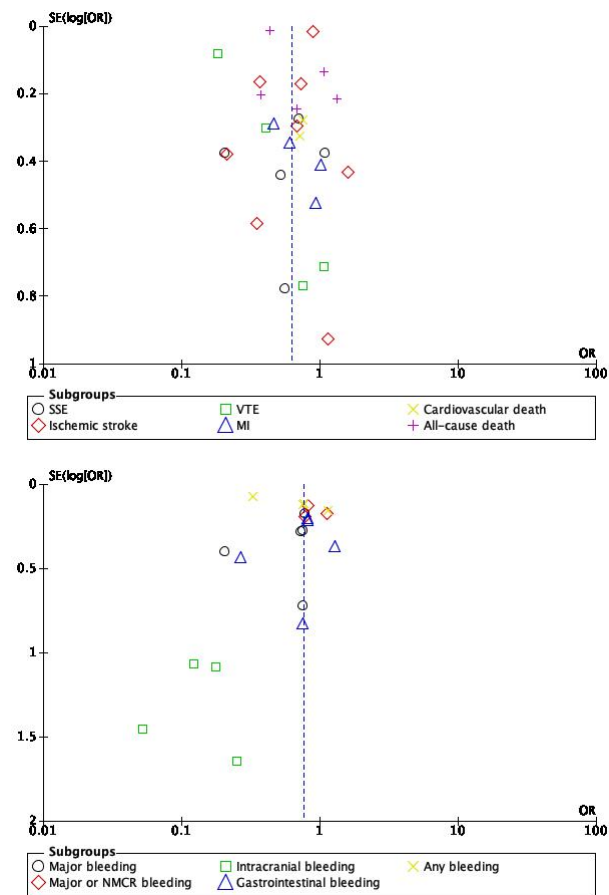

**Supplementary Figure 2. The funnel plots for effectiveness and safety outcomes of DOACs versus warfarin (unadjusted data)**

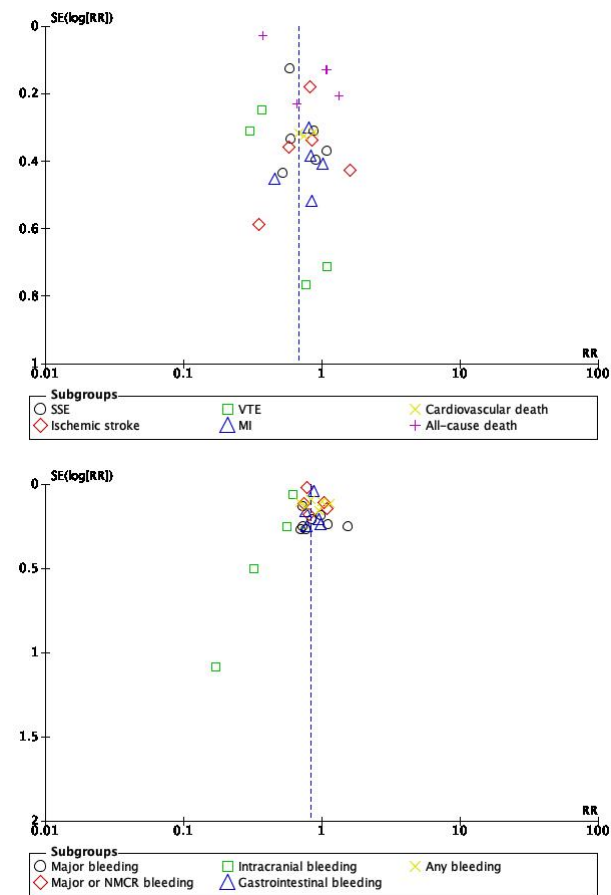

**Supplementary Figure 3. The funnel plots for effectiveness and safety outcomes of DOACs versus warfarin (adjusted data)**
